# Supplementary material
Source: PubMed Central journal article supplement (PMC3993874)
Supplement: bm5001026_si_001.pdf [file bm5001026_si_001.pdf]

Supporting Information

**Polypeptides with Quaternary Phosphonium Side Chains: Synthesis,  
Characterization, and Cell-Penetrating Properties**

Ziyuan Song<sup>†</sup>, Nan Zheng<sup>†</sup>, Xiaochu Ba<sup>‡</sup>, Lichen Yin<sup>†</sup>, Rujing Zhang<sup>†</sup>, Liang Ma<sup>†</sup>, Jianjun  
Cheng<sup>\*,†</sup>

<sup>†</sup>Department of Materials Science and Engineering, University of Illinois at Urbana–Champaign,  
1304 West Green Street, Urbana, Illinois 61801, United States

<sup>‡</sup>Department of Chemistry, University of Illinois at Urbana–Champaign, 505 South Mathews  
Avenue, Urbana, Illinois 61801, United States

\*Corresponding author. Tel.: (+1) 217-244-3924; Fax: (+1) 217-333-2736

Email: jianjunc@illinois.edu

**Table S1.** Synthesis of polypeptides with chloroalkyl side chains<sup>a</sup>

| entry | monomer       | M/I  | $M_n$ ( $M_n^*$ ) <sup>b,c</sup> (kDa) | $M_w/M_n^c$ |
|-------|---------------|------|----------------------------------------|-------------|
| 1     | CP-L-Glu-NCA  | 40/1 | 8.1 (8.2)                              | 1.02        |
| 2     | CH-L-Glu-NCA  | 40/1 | 10.0 (9.9)                             | 1.02        |
| 3     | CH-DL-Glu-NCA | 40/1 | 9.7 (9.9)                              | 1.10        |

<sup>a</sup> Polymerizations were carried out at room temperature for 48 h. Monomer conversions were all above 99% as indicated by FTIR. <sup>b</sup> Obtained MW (expected MW). <sup>c</sup> Determined by GPC.

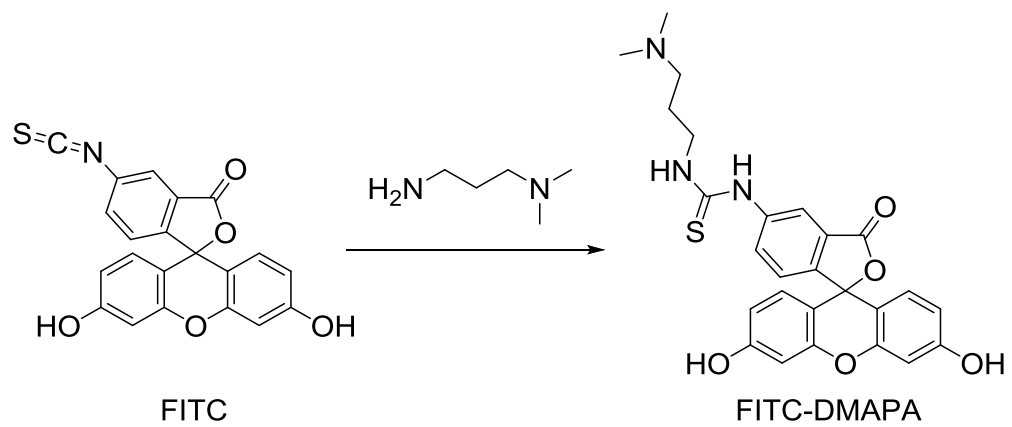

**Scheme S1.** Synthesis of fluorescein-functionalized tertiary amine (FITC-DMAPA).

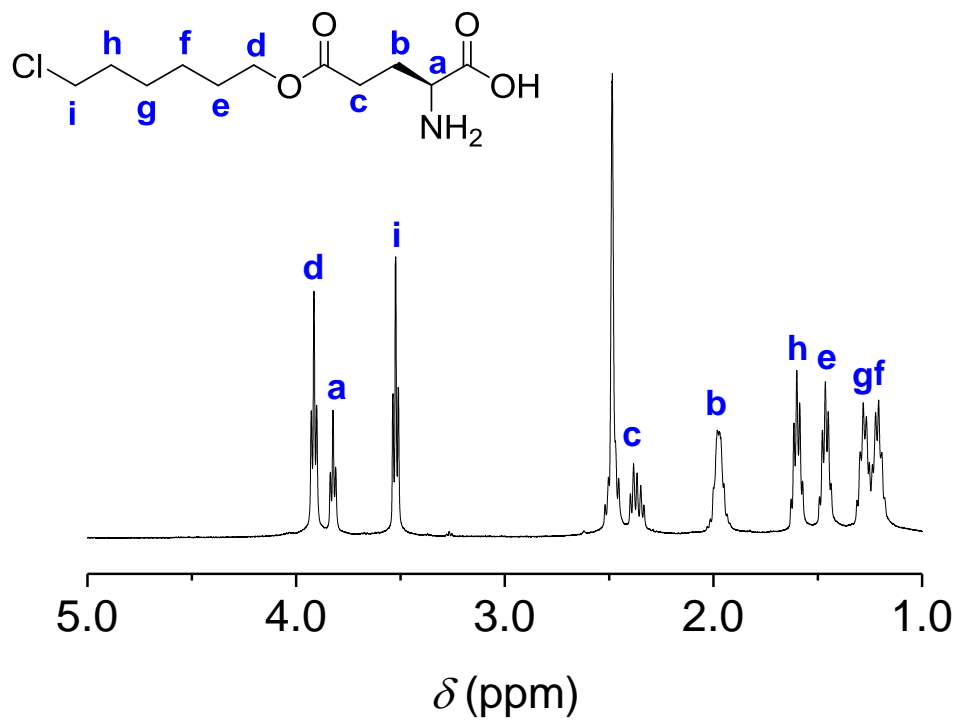

**Figure S1.** <sup>1</sup>H NMR spectrum of CH-L-Glu in DMSO-*d*<sub>6</sub>/D<sub>2</sub>O-DCl (9:1, v/v).

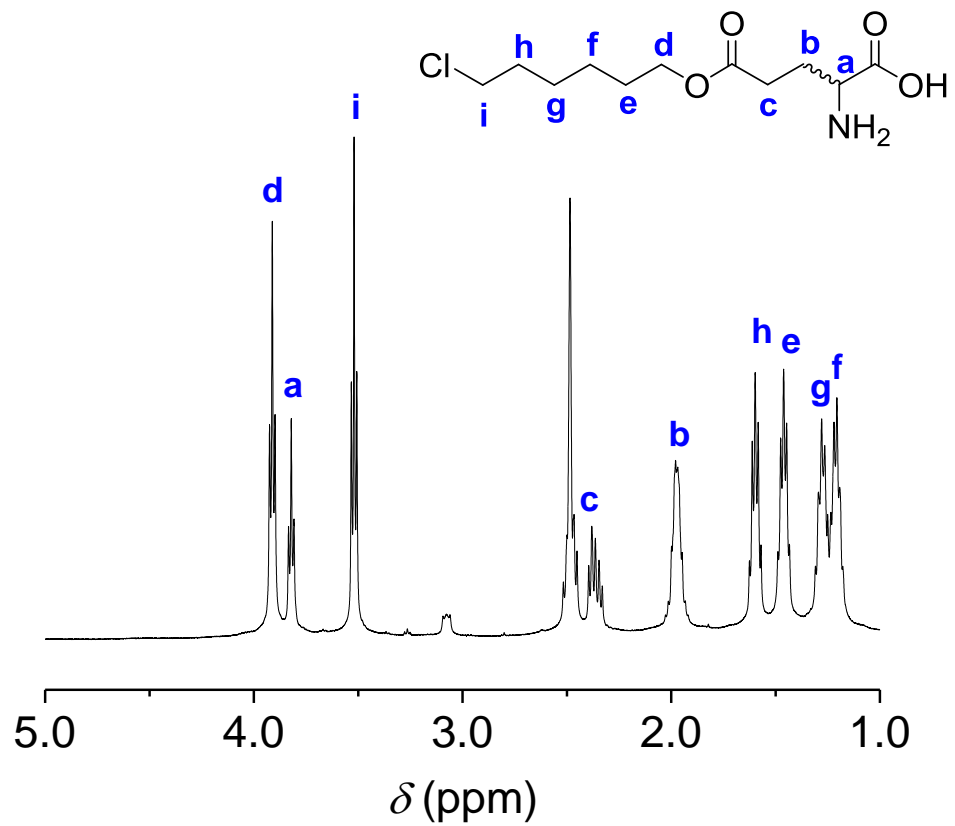

**Figure S2.** <sup>1</sup>H NMR spectrum of CH-DL-Glu in DMSO-*d*<sub>6</sub>/D<sub>2</sub>O-DCl (9:1, v/v).

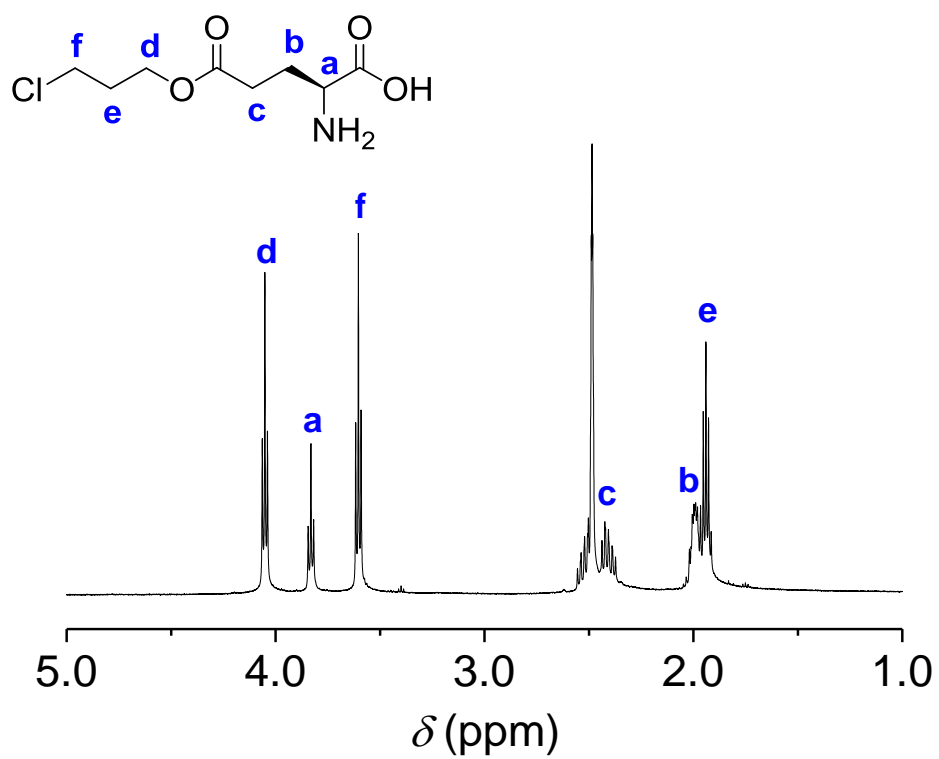

**Figure S3.** <sup>1</sup>H NMR spectrum of CP-L-Glu in DMSO-*d*<sub>6</sub>/D<sub>2</sub>O-DCI (9:1, v/v).

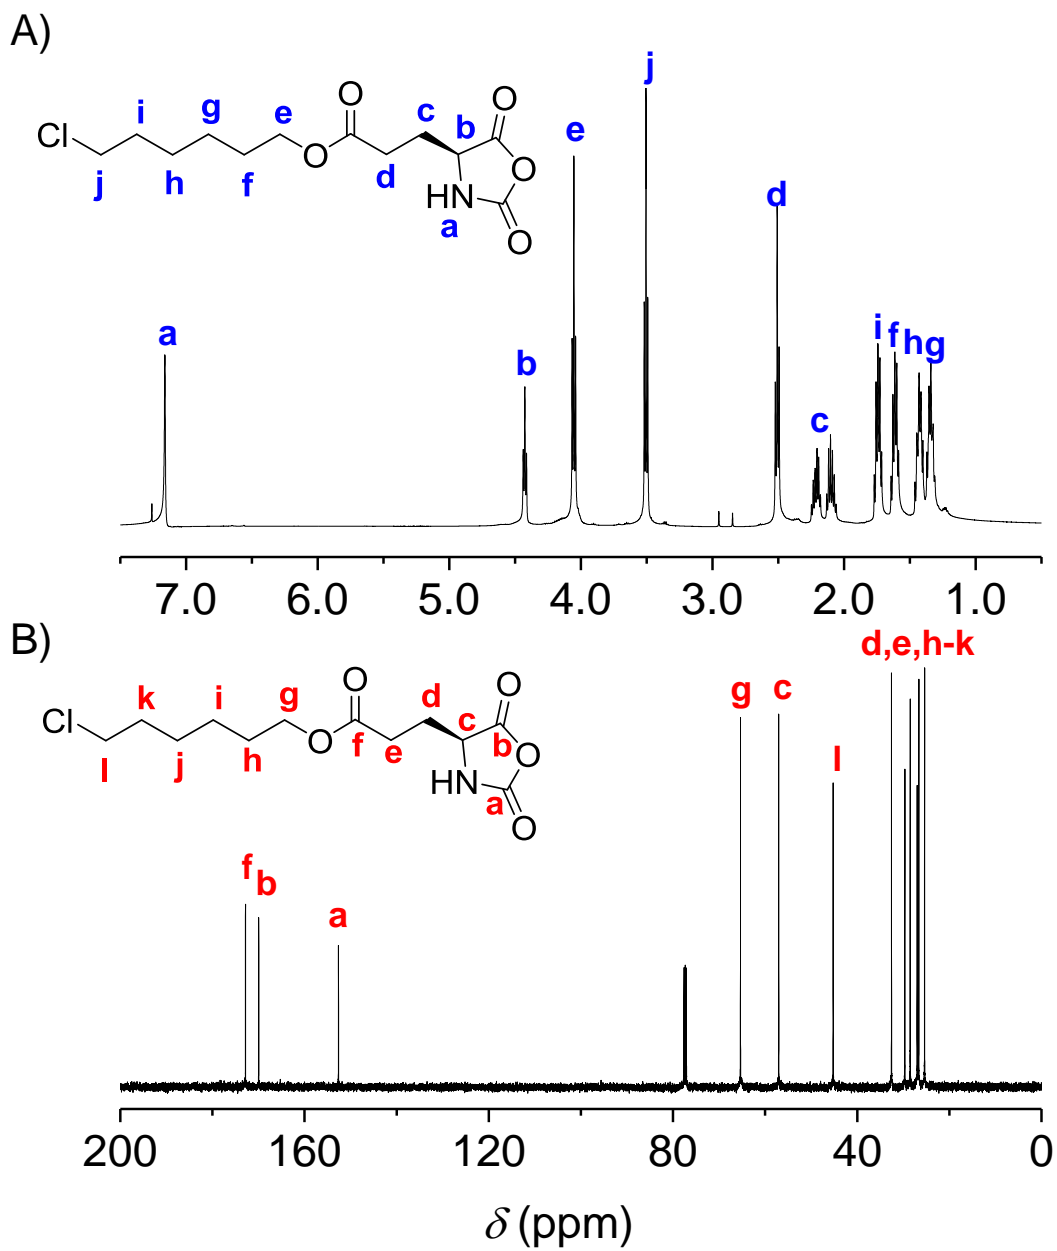

**Figure S4.**  $^1\text{H}$  (A) and  $^{13}\text{C}$  (B) NMR spectra of CH-L-Glu-NCA in  $\text{CDCl}_3$ .

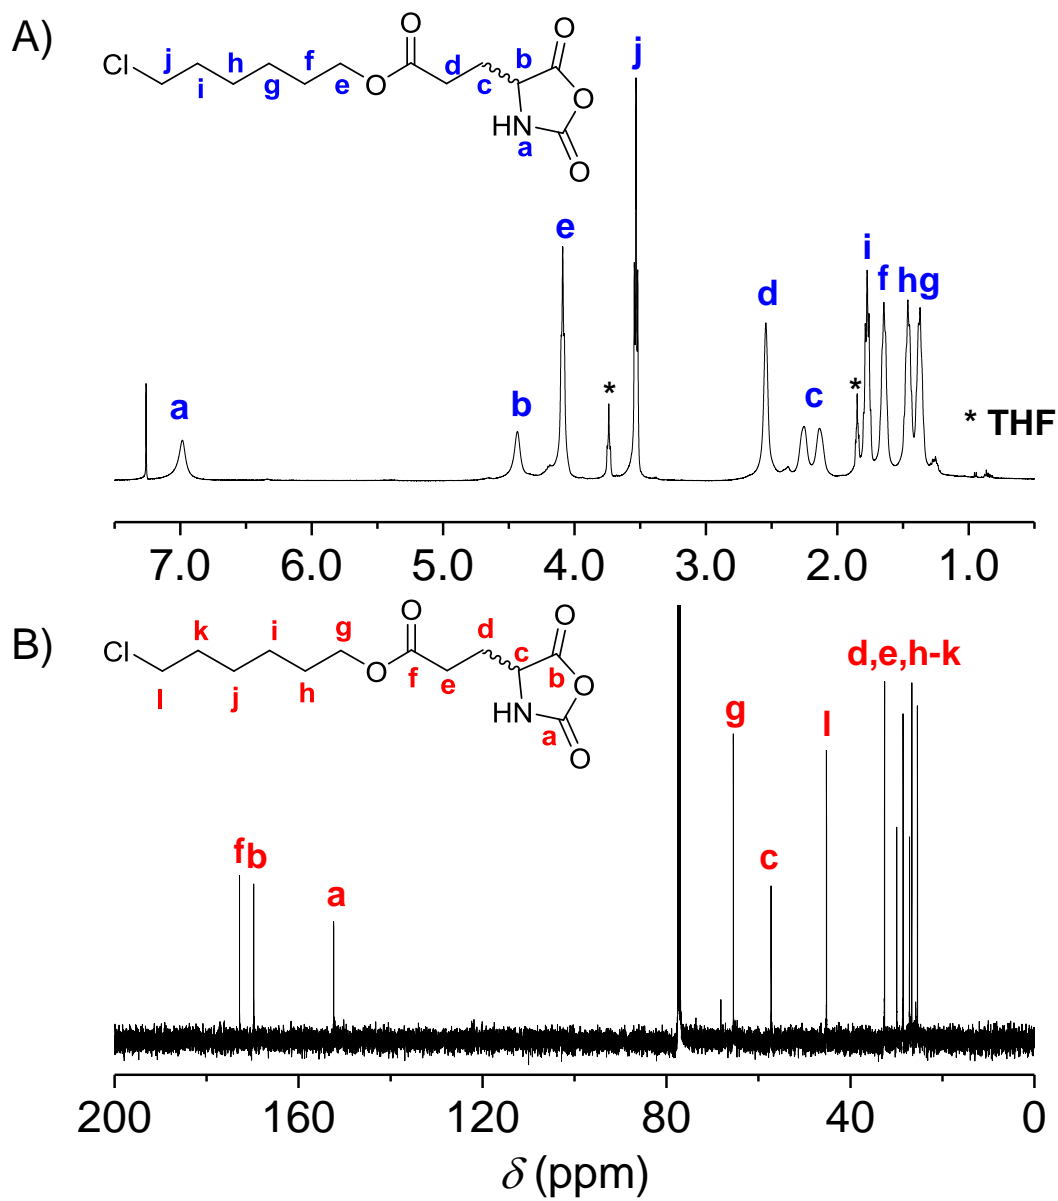

**Figure S5.**  $^1\text{H}$  (A) and  $^{13}\text{C}$  (B) NMR spectra of CH-DL-Glu-NCA in  $\text{CDCl}_3$ .



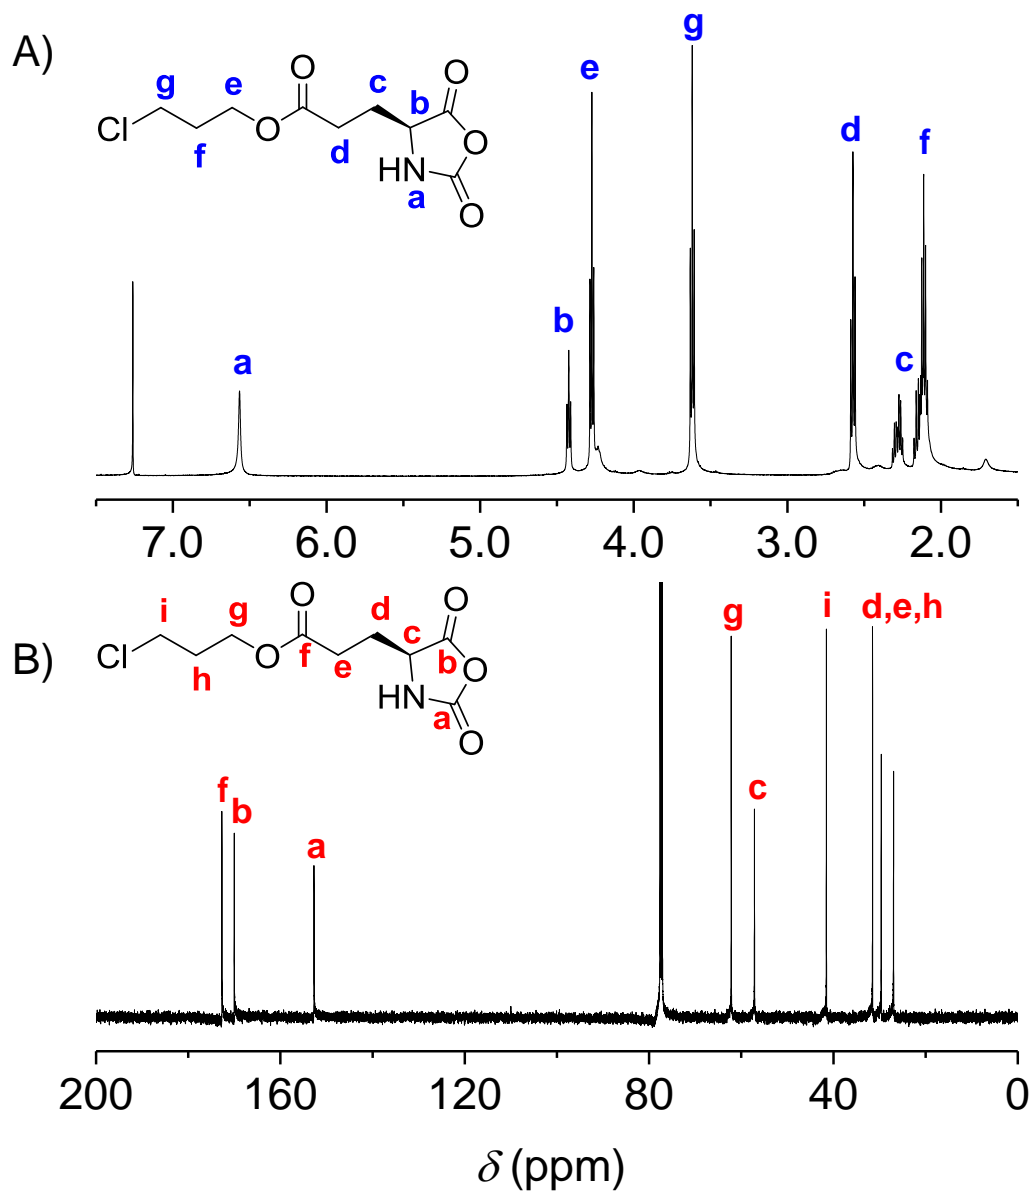

**Figure S6.**  $^1\text{H}$  (A) and  $^{13}\text{C}$  (B) NMR spectra of CP-L-Glu-NCA in  $\text{CDCl}_3$ .

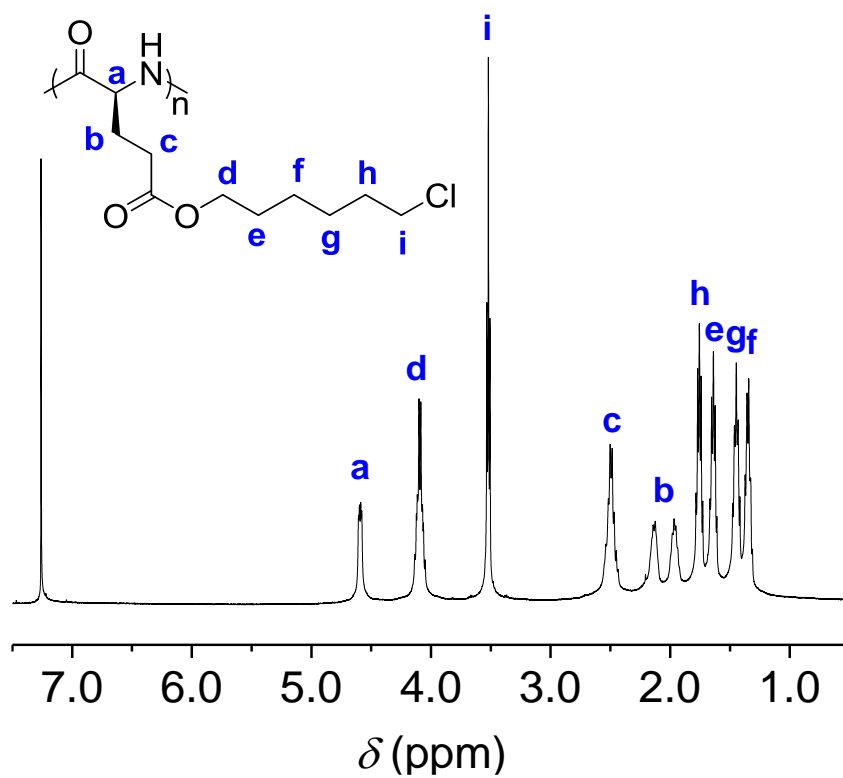

**Figure S7.**  $^1\text{H}$  NMR spectrum of PCHLG in  $\text{CDCl}_3/\text{TFA-}d$  (85:15, v/v).

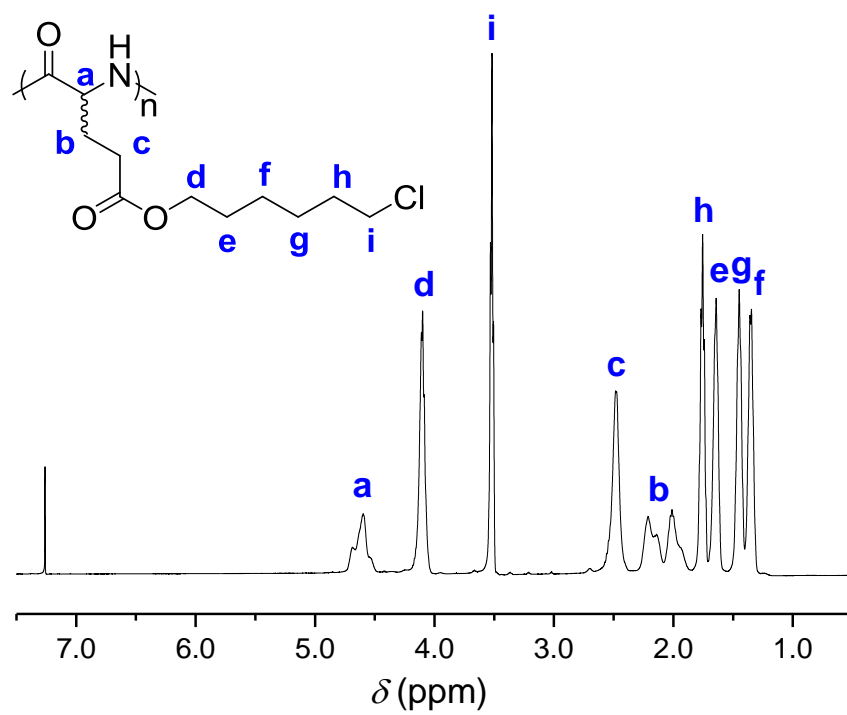

**Figure S8.** <sup>1</sup>H NMR spectrum of PCHDLG in CDCl<sub>3</sub>/TFA-*d* (85:15, v/v).

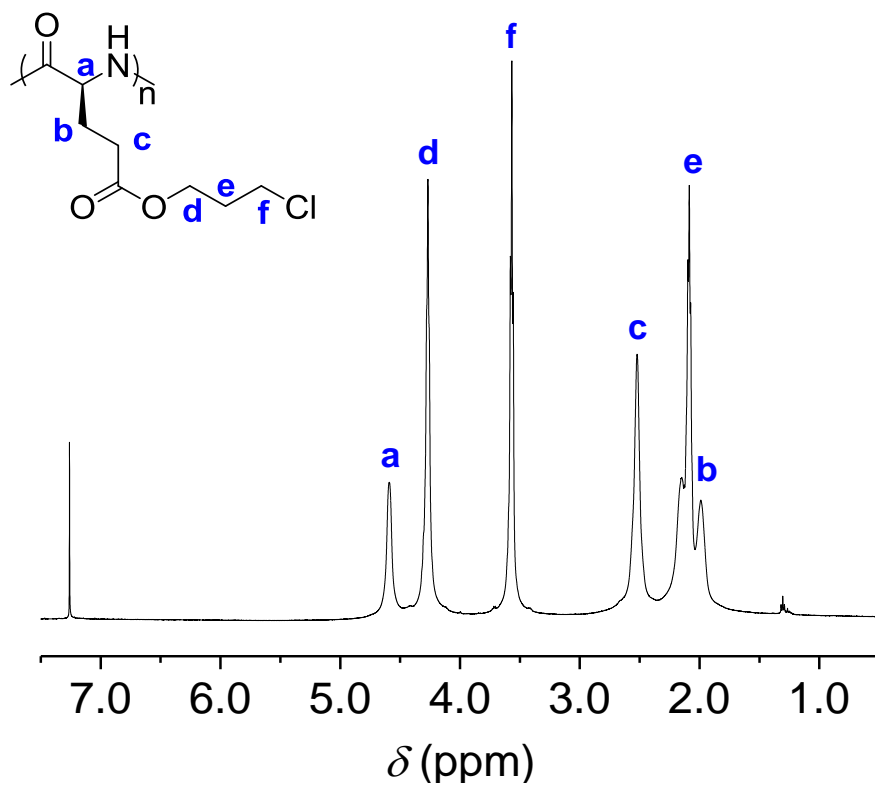

**Figure S9.** <sup>1</sup>H NMR spectrum of PCPLG in CDCl<sub>3</sub>/TFA-*d* (85:15, v/v).

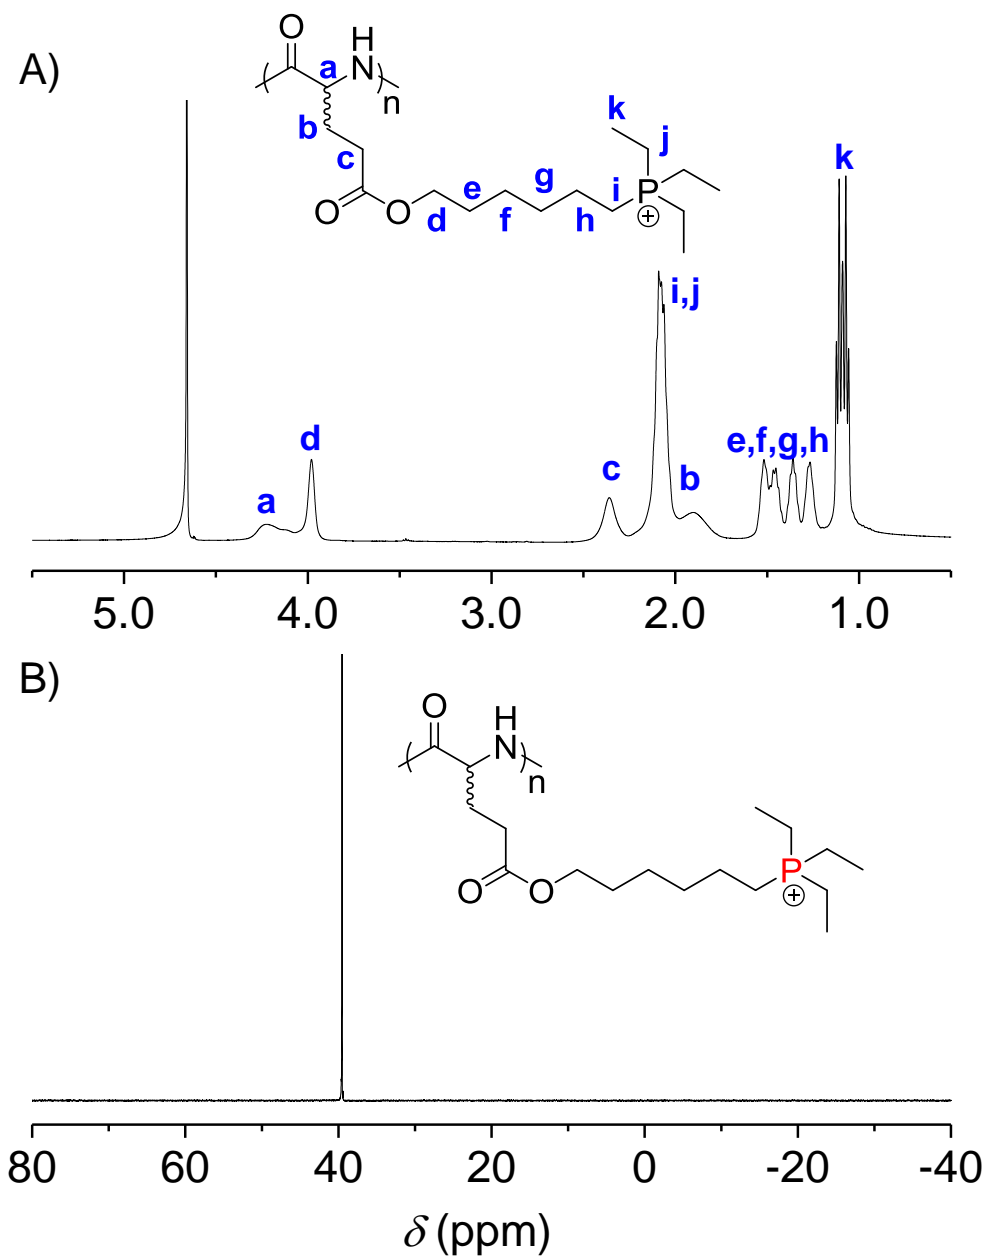

**Figure S10.**  $^1\text{H}$  (A) and  $^{31}\text{P}$  (B) NMR spectra of PHDLG-TEP in  $\text{D}_2\text{O}$ .

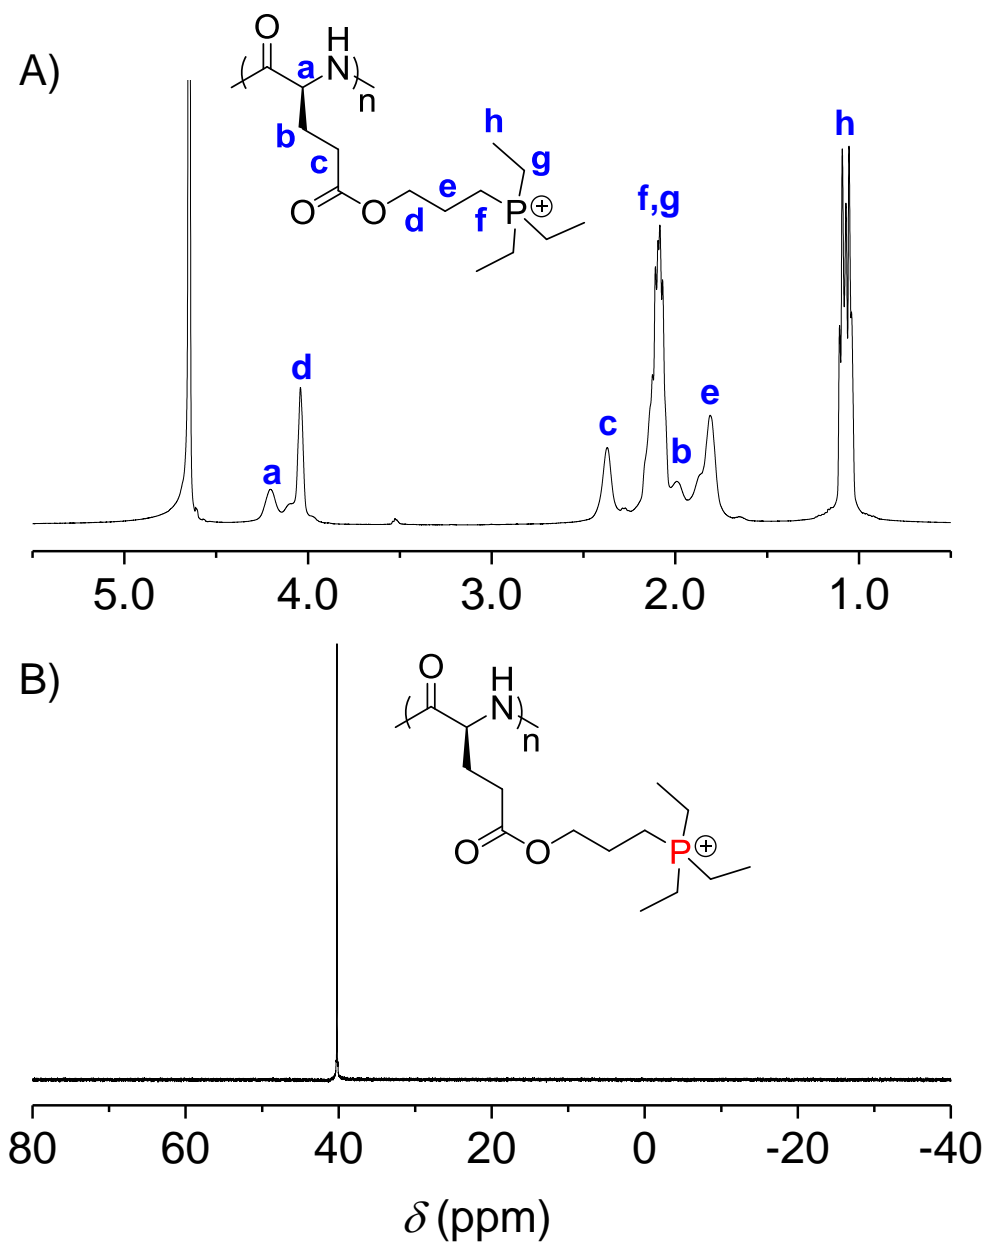

**Figure S11.**  $^1\text{H}$  (A) and  $^{31}\text{P}$  (B) NMR spectra of PPLG-TEP in  $\text{D}_2\text{O}$ .

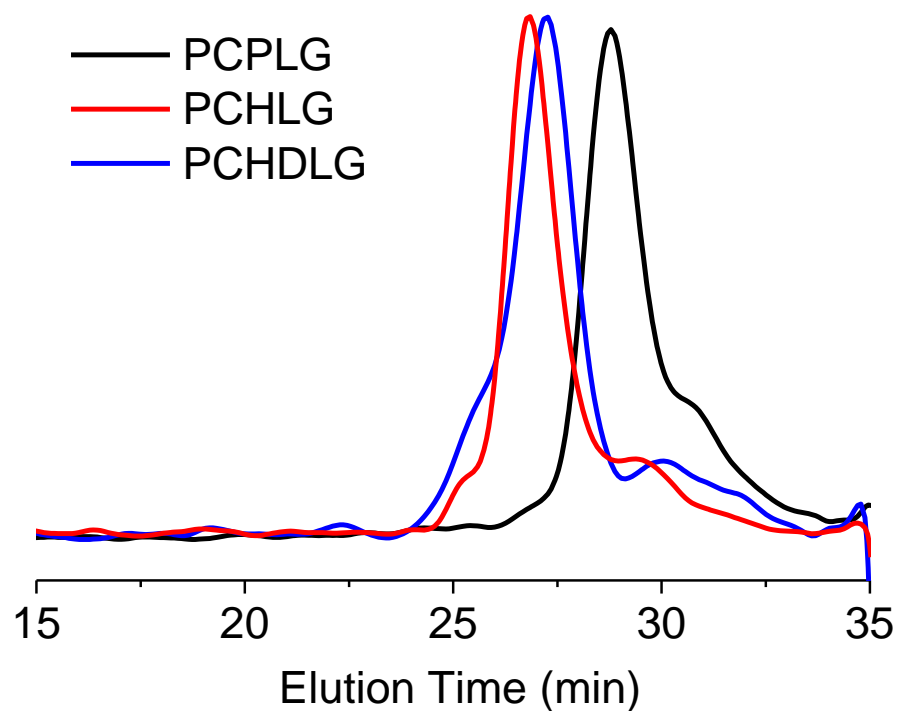

**Figure S12.** GPC traces of polypeptides with chloroalkyl side chains.

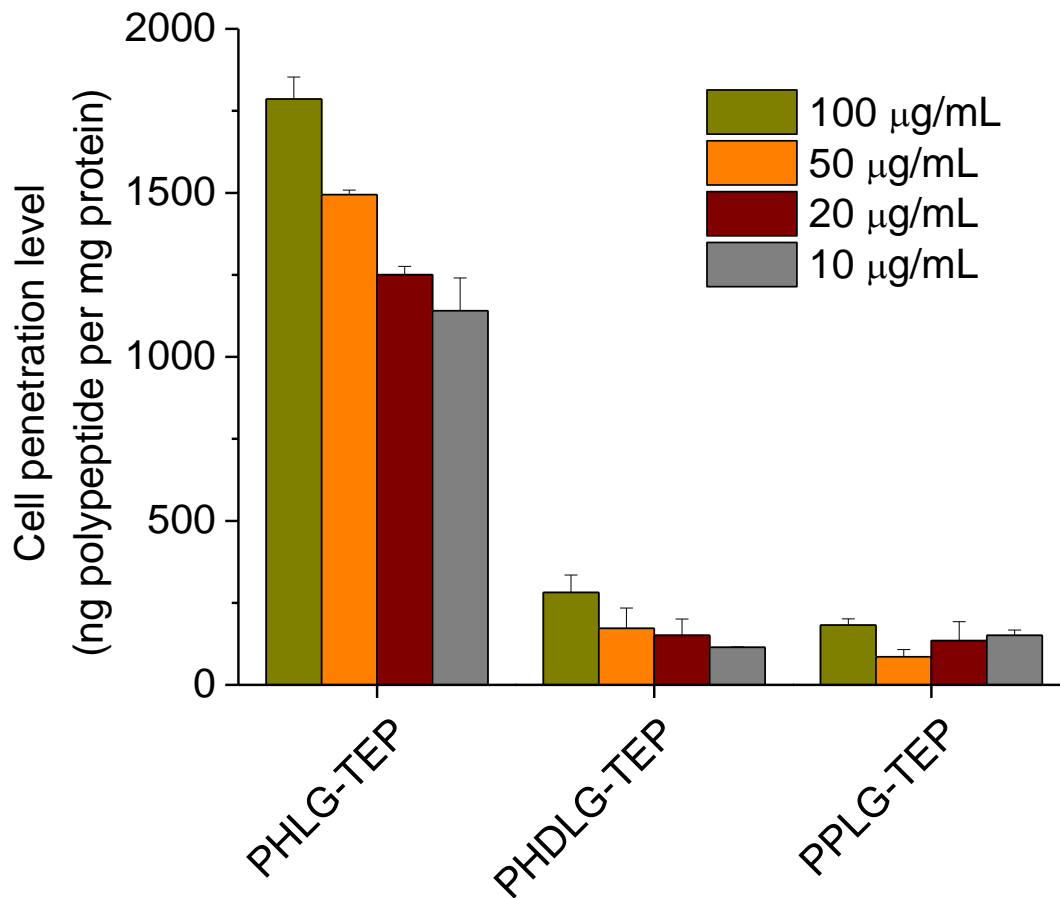

**Figure S13.** Uptake level of fluorescein-labeled polypeptides in HeLa cells at different polypeptide concentrations (n = 3). The incubation time was maintained constant at 2 h.



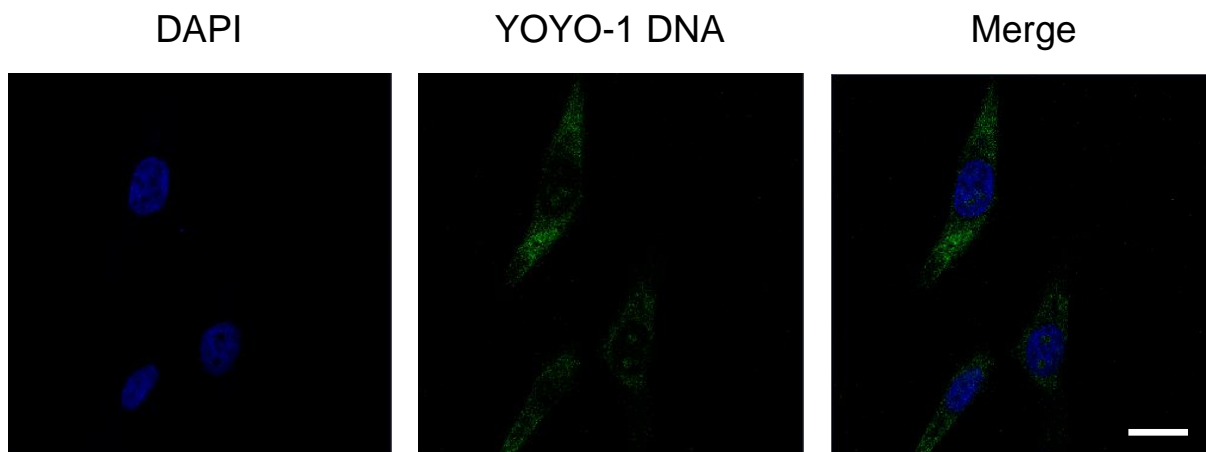

**Figure S14.** CLSM images of HeLa cells incubated with PHLG-TEP and YOYO-1-labeled DNA complex at 37 °C for 4 h (bar = 20  $\mu\text{m}$ ).
